# Supplementary material for: Giant tunable Rashba spin splitting in two-dimensional polar perovskites TlSnX3 (X = Cl, Br, I)
Source: Royal Society of Chemistry journal article supplement (doi:10.1039/d2cp01980a), 2022-01-01
Supplement: d2cp01980a1.pdf [file d2cp01980a1.pdf]

---

# Giant tunable Rashba Spin Splitting in Two-Dimensional Polar Perovskites TlSnX<sub>3</sub> (X=Cl, Br, I)

Yuming Jin<sup>a</sup>, Jia Li<sup>a\*</sup>, Qian Zhang<sup>a</sup>, Guang Wang<sup>a</sup>, Ze Liu<sup>b</sup>, Xiujuan Mao<sup>b</sup>

<sup>a</sup>*School of Science, Hebei University of Technology, Tianjin 300401, People's Republic of China*

<sup>b</sup>*School of Materials Science and Engineering, Hebei University of Technology, Tianjin 300401, People's Republic of China*

## I. STRUCTURE AND STABILITY

Table S1: Formation energy  $E_f$  (eV per f.u.) of 2D polar perovskites TlSnX<sub>3</sub> (X=Cl, Br, I)

| structure           | $E_f$ (2D) |
|---------------------|------------|
| TlSnCl <sub>3</sub> | -0.512     |
| TlSnBr <sub>3</sub> | -1.740     |
| TlSnI <sub>3</sub>  | -1.859     |

In order to verify the stability of predicted two-dimensional (2D) polar perovskites TlSnX<sub>3</sub> (X=Cl, Br, I), we calculate the thermodynamic stability and dynamic stability of them. The formation energies of 2D TlSnX<sub>3</sub> (X=Cl, Br, I) are defined as follows:

$$E_f(2D) = E_{2D} - E_{AX} - E_{BX_2}$$

---

The calculation results show that the formation energy of 2D  $\text{TlSnX}_3$  ( $X=\text{Cl, Br, I}$ ) is negative, so they are stable in thermodynamics.

In order to further confirm the thermal stability, we calculate the molecular dynamics simulation of these materials. As shown in Figure S1, the supercell structure and total energy evolution of 2D  $\text{TlSnX}_3$  ( $X=\text{Cl, Br, I}$ ) calculated by 8ps molecular dynamics are given respectively. The results confirm the stability of these 2D polar perovskites at 300K and thermal fluctuation have little effect on the structures, so the physical properties such as electronic structure are not affected.

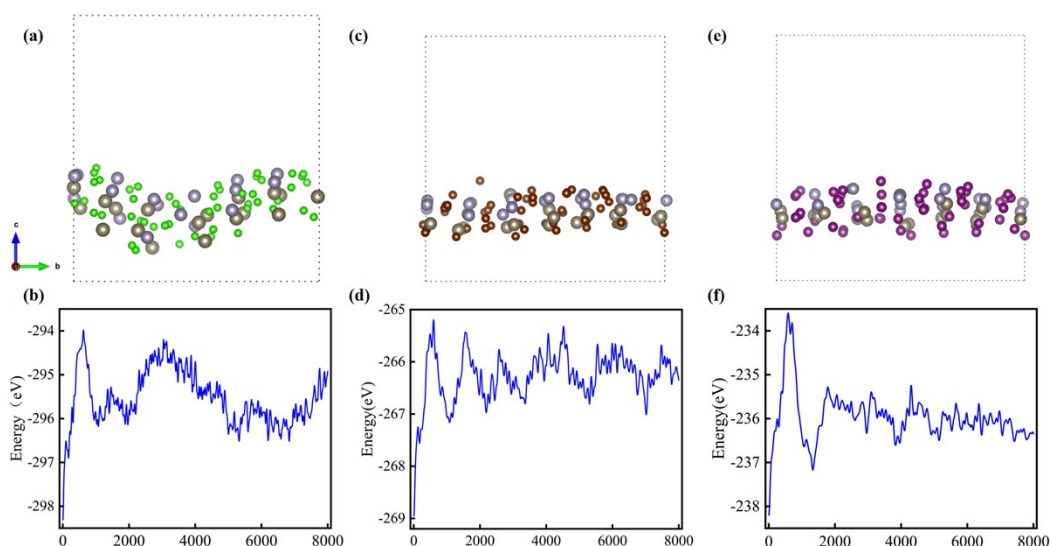

Fig. S1: Ab initio molecular dynamics simulation of 2D polar perovskites  $\text{TlSnX}_3$  ( $X=\text{Cl, Br, I}$ ) ( $T=300$  K). (a) After 8ps molecular dynamics calculation, the supercell structure of  $\text{TlSnCl}_3$  and the corresponding (b) total energy evolution were obtained. (c) After 8ps molecular dynamics calculation, the supercell structure of  $\text{TlSnBr}_3$  and the corresponding (d) total energy evolution were obtained. (e) After 8ps molecular dynamics calculation, the supercell structure of  $\text{TlSnI}_3$  and the corresponding (f) total energy evolution were obtained.

---

Secondly, we take  $\text{TlSnI}_3$  as an example to further study the dynamic stability of these 2D polar perovskites by calculating the phonon spectra. As shown in Fig. s2, unfortunately,  $\text{TlSnI}_3$  has an imaginary frequency of about 0.5 THz. We think this may be ascribed to the calculation accuracy, so we try to improve the accuracy and optimize the structure by adjusting the calculation parameters and expanding the size of the supercell. We find that the negative frequency is indeed reduced by improving the calculation accuracy, but it does take up more calculation resources. In fact, the imaginary frequency of perovskites has been mentioned in previous studies. For example,  $\text{LiOsO}_3$  with  $R\bar{3}c$  room temperature phase have imaginary frequency around 5 THz; the tetragonal phase  $\text{RbPbI}_3$  have imaginary frequency around 0.5 THz; In the research of perovskites  $\text{Cs}_2\text{AgInBr}_{(6-x)}\text{Cl}_x$ , it's also claimed that small imaginary frequency is acceptable errors in phonon calculations. Thus, through the analysis of binding energy, molecular dynamics and phonon spectrum, it can be considered that these 2D polar perovskites possess stable structures.

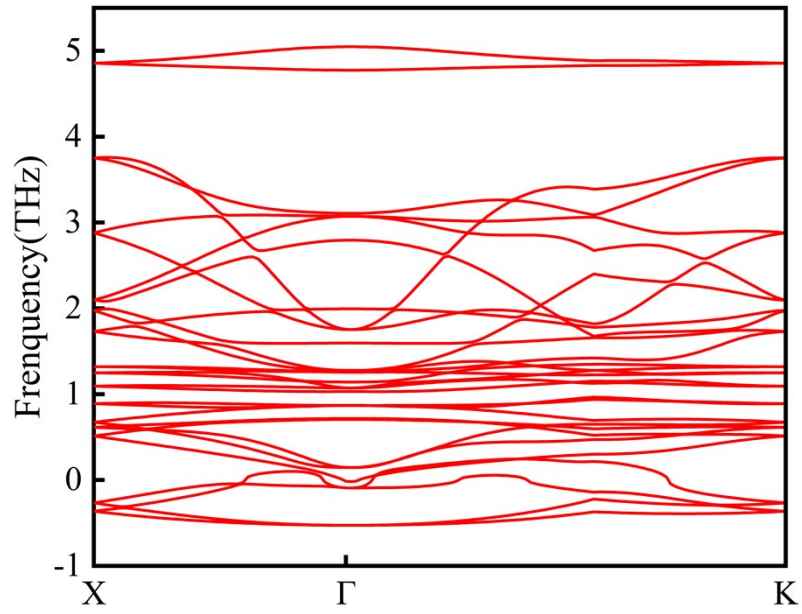

Fig. S2: Phonon spectra of TlSnI<sub>3</sub>

## II. MECHANISM ANALYSIS

Table S2: Bader charge analysis of 2D perovskites TlSnX<sub>3</sub> (X=Cl, Br, I).  $Q_B$  is the average charge of B site, and  $Q_X$  is the average charge of X site (Cl/Br/I).

|                     | $Q_B$ | $Q_X$  |
|---------------------|-------|--------|
| TlSnCl <sub>3</sub> | 0.829 | -0.492 |
| TlSnBr <sub>3</sub> | 1.051 | -0.593 |
| TlSnI <sub>3</sub>  | 1.204 | -0.654 |

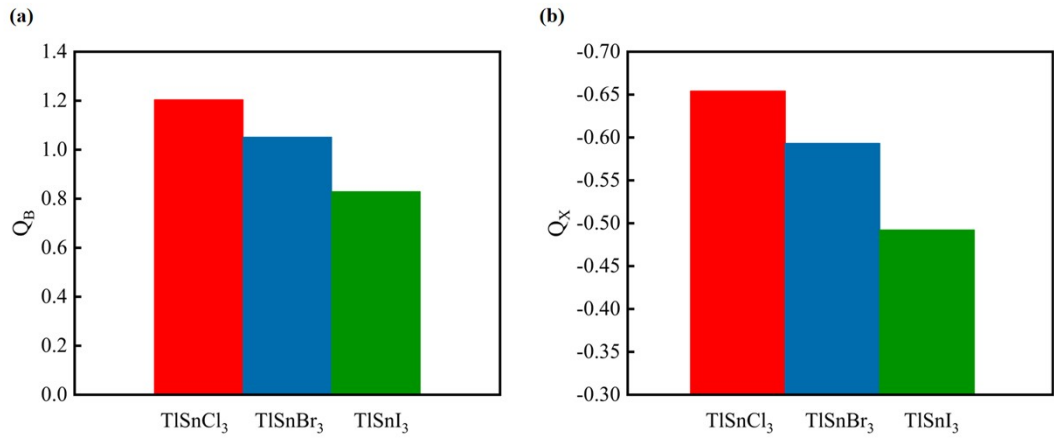

Fig. S3: (a)  $Q_B$  and (b)  $Q_X$  of 2D polarperovskites TlSnX<sub>3</sub> (X=Cl, Br, I).

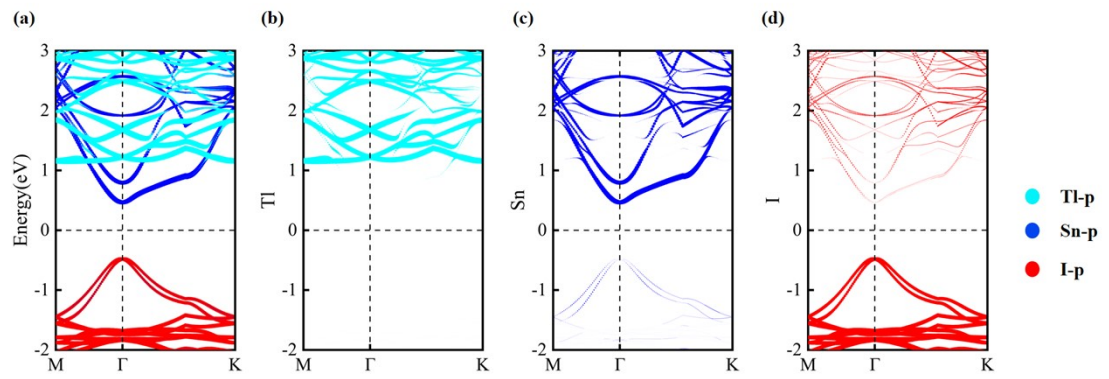

Fig. S4: The projected band structures of (a) TlSnI<sub>3</sub> with SOC for (b) Tl, (c) Sn and (d) I atoms. (The cyan, blue and red represent the P orbitals of Tl, Sn and I atoms, respectively)

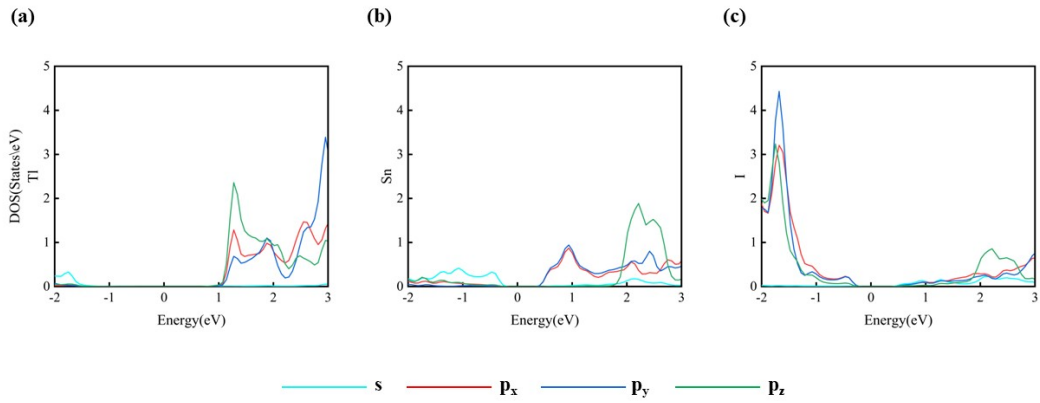

Fig. S5: The density of states of TlSnI<sub>3</sub> with SOC for (a) Tl, (b) Sn and (c) I atoms. (The green, red, blue and cyan lines represent s, p<sub>x</sub>, p<sub>y</sub> and p<sub>z</sub> orbits respectively.)

### III. ELECTRONIC PROPERTIES OF TlSnI<sub>3</sub> 3D BULK AND 2D NON-POLAR STRUCTURES

The electronic properties of 2D and 3D tetragonal TlSnI<sub>3</sub> were calculated by first principles. Two 2D nonpolar perovskites with TlI-terminated and SnI<sub>2</sub>-terminated slabs will appear if the (001) plane is cut.

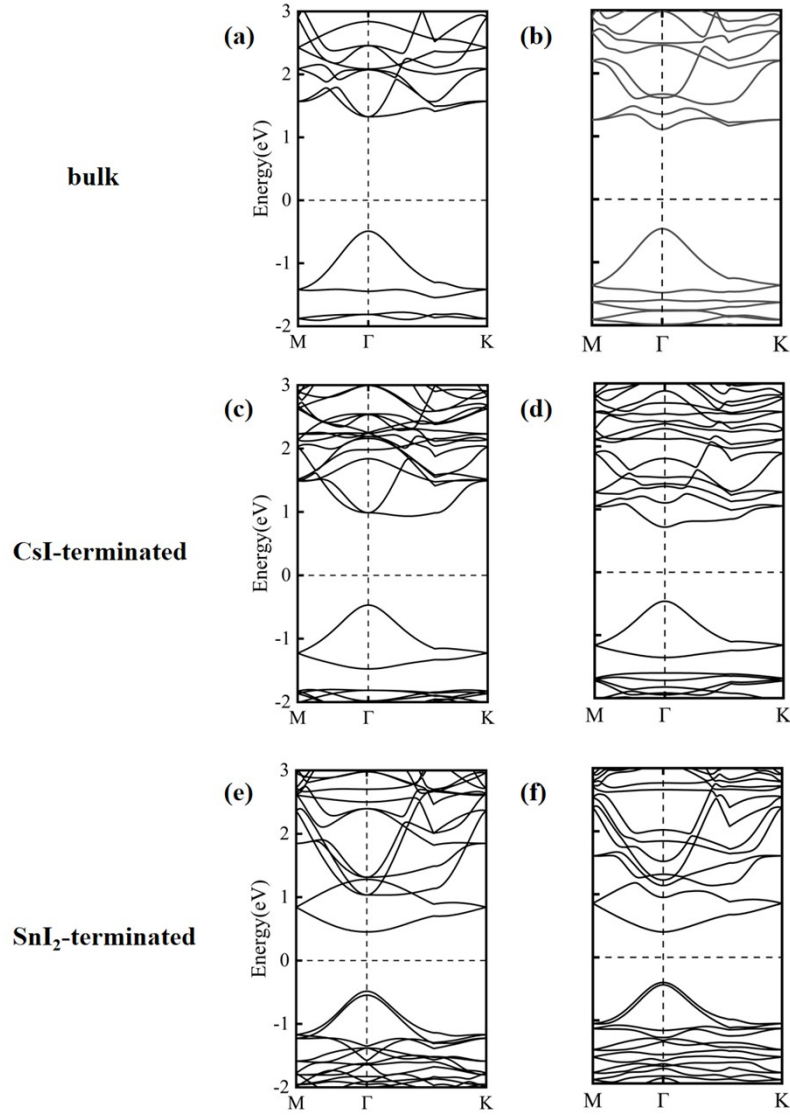

Fig. S6: Band structures of TlSnI<sub>3</sub> 3D bulk and 2D non-polar structures without (left) and SOC (right).

#### IV. ELECTRONIC STRUCTURES OF MULTILAYER 2D TlSnI<sub>3</sub> PEROVSKITES

The electronic structure of 2D multilayer TlSnI<sub>3</sub> is calculated by first principles, as shown in Fig. S7. The results show that the Rashba effect still exists near the  $\Gamma$  point of 2D multilayer perovskites, but the Rashba constant is much smaller.

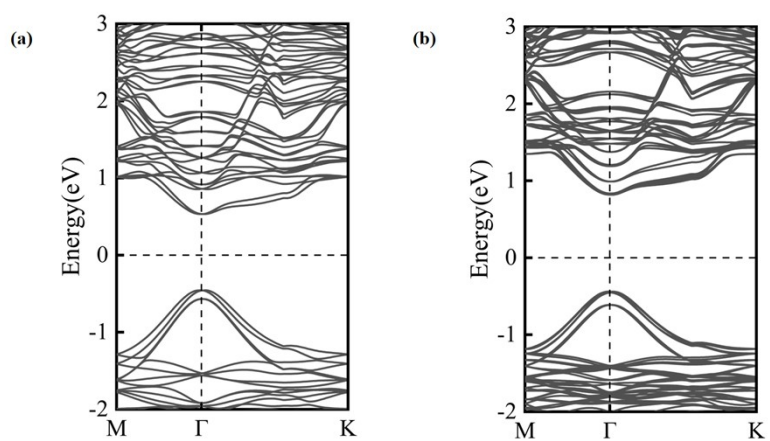

Fig. S7: Electronic structure of (a) 2L and (b) 3L of 2D polar perovskite  $\text{TlSnI}_3$
